# Supplementary material for: The Cannabinoid Receptor 2 Protects Against Alcoholic Liver Disease Via a Macrophage Autophagy-Dependent Pathway
Source: PubMed Central journal article supplement (PMC4921859; doi:10.1038/srep28806), 2016-06-27
Supplement: srep28806-s1.pdf [file srep28806-s1.pdf]

**The Cannabinoid receptor 2 protects against alcoholic liver disease via a macrophage  
autophagy-dependent pathway**

Timothé Denaës<sup>1,2</sup>, Jasper Lodder<sup>1,2</sup>, Marie-Noële Chobert<sup>1,2</sup>, Isaac Ruiz<sup>1,2</sup>, Jean-Michel Pawlowsky<sup>1,2</sup>, Sophie Lotersztajn<sup>1,2,3,4,\*</sup>, Fatima Teixeira-Clerc<sup>1,2,\*</sup>

<sup>1</sup> INSERM U955, Institut Mondor de Recherche Biomédicale, Créteil, F-94000 France

<sup>2</sup> Université Paris-Est, Faculté de Médecine, UMR-S955, Créteil, F-94000 France

<sup>3</sup> INSERM U1149, Center for Research on Inflammation, Paris, F-75018, France

<sup>4</sup> Université Paris Diderot, Sorbonne Paris Cité, Laboratoire d'Excellence Inflammex, Faculté de Médecine, Site Xavier Bichat, Paris, F-75018, France

\* corresponding authors

**Correspondence:**

Dr. Fatima Teixeira-Clerc

INSERM U955, Institut Mondor de Recherche Biomédicale

Hôpital Henri Mondor, 94000 Créteil, France

Tel: +33 (0)1 49 81 35 37; Fax: +33 (0)1 48 98 48 44;

e-mail: fatima.clerc@inserm.fr

or

Dr Sophie Lotersztajn

INSERM U1149, Center for Research on Inflammation

Faculté de Médecine Xavier Bichat

16 rue Henri Huchard, 75018 Paris, France

Tel: +33 (0)1 57 27 74 35

e-mail: sophie.lotersztajn@inserm.fr

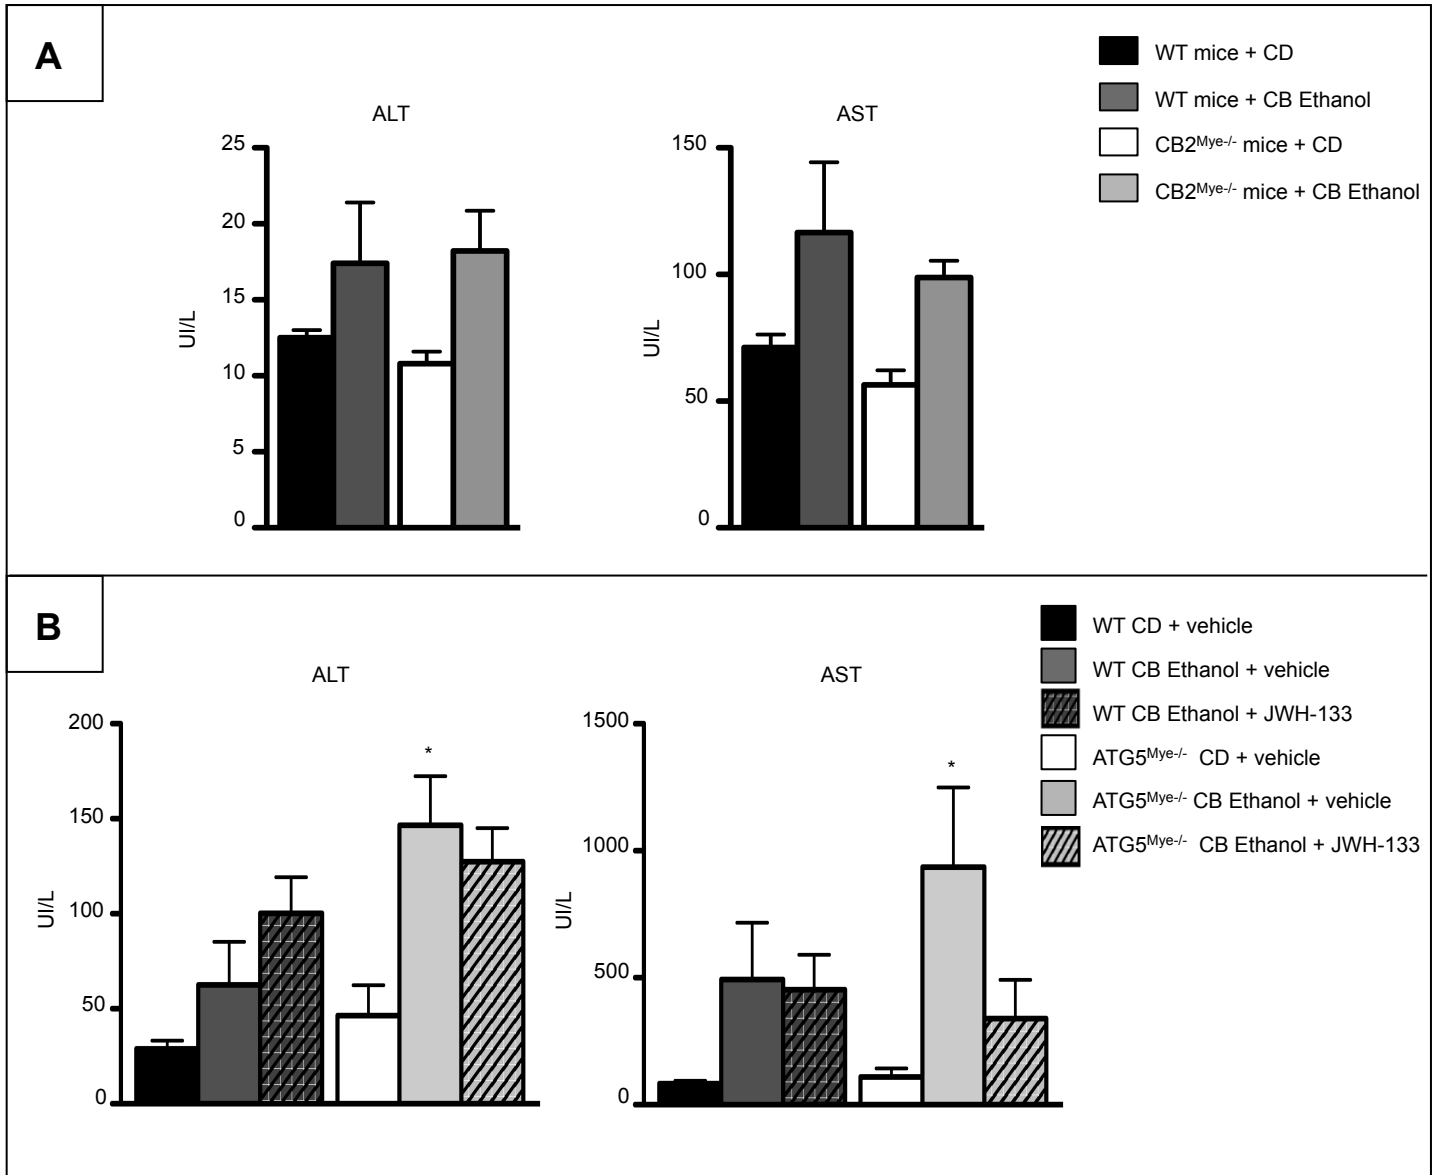

**Supplementary Figure S1.** Alanine aminotransferase (ALT) and aspartate aminotransferase (AST) levels (A) in CD- and chronic-plus-binge ethanol-fed WT and CB2<sup>Myc-/-</sup> mice and (B) in CD- and chronic-plus-binge ethanol-fed WT and ATG5<sup>Myc-/-</sup> mice treated with 3 mg/kg of JWH-133 or its vehicle. Data are mean  $\pm$  SEM. \*  $p < 0.05$  for CD vs chronic-plus-binge ethanol.
